# Supplementary material for: The vaccinia virus based Sementis Copenhagen Vector vaccine against Zika and chikungunya is immunogenic in non-human primates
Source: PubMed Central journal article supplement (PMC7265471; doi:10.1038/s41541-020-0191-8), 2020-06-02
Supplement: 41541_2020_191_MOESM1_ESM.pdf [file 41541_2020_191_MOESM1_ESM.pdf]

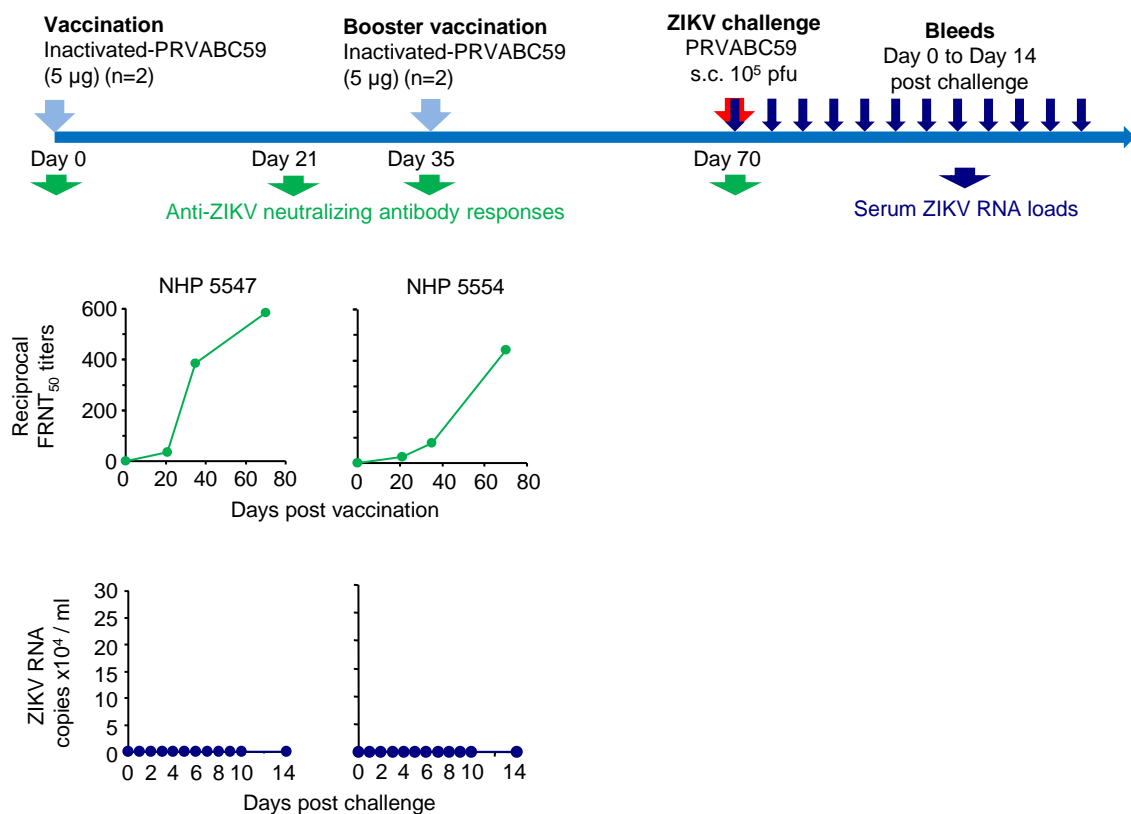

**Supplementary Fig 1.** Positive control ZIKV vaccine. Formalin inactivated PRVABC59 Vaccine (lot number 2016), (from Walter Reed Army Institute of Research, Springfield, MD, USA) was given twice i.m. (in 0.5 ml) as described (Rayner *et al* 2018) to 2 NHPs, with neutralizing antibody and challenge as in Fig. 1. Note vaccine and challenge strain were identical.

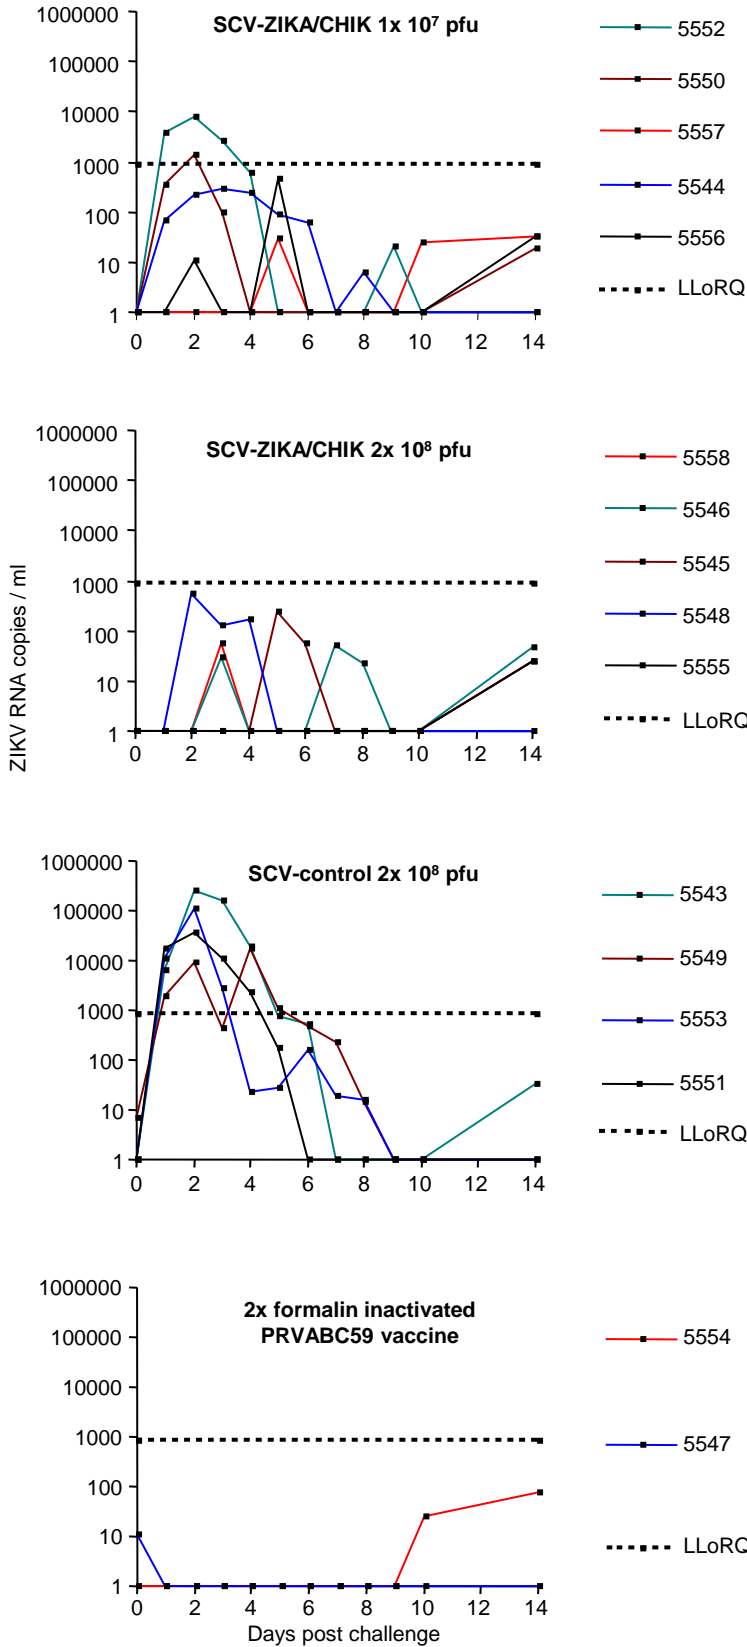

**Supplementary Fig. 2.** Log graphs of ZIKV RNA copies post challenge. The lower limit of reliable quantification (LLoRQ) was 860; over a large number of qRT PCR experiments using samples spiked with *in vitro*-transcribed ZIKV RNA, this was the lowest limit of 100% reliable quantification. All SCV-control vaccinated NHPs exceeded this limit on multiple days post challenge. For NHPs vaccinated once at a dose of 10<sup>7</sup> pfu of SCV-ZIKA/CHIK (1x 10<sup>7</sup>), NHP 5552 exceeded this limit on 3 consecutive days clearly indicating a low level viremia. NHP 5550 also just exceeded this limit on one day, indicating a brief low level viremia. No serum samples from NHPs vaccinated twice with SCV-ZIKA/CHIK at a dose of 10<sup>8</sup> pfu (2x 10<sup>8</sup>) gave qRT PCR values >860 viral RNA copy numbers per ml post-vaccination; viremia in these NHPs is thus below the limit at which virus can reliably be quantified.

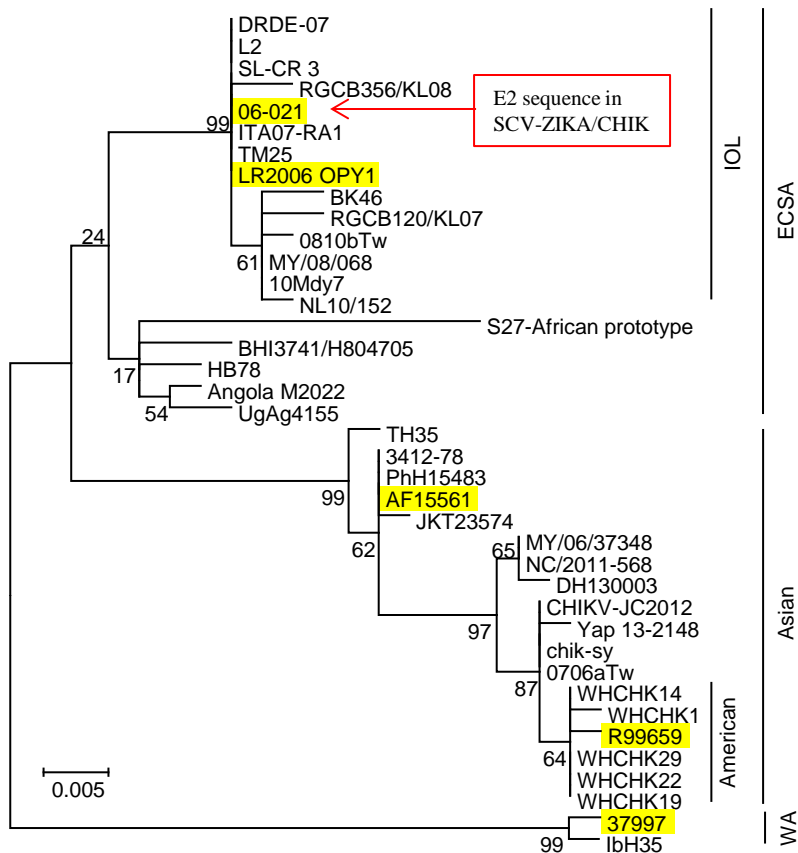

**Supplementary Fig. 3.** Dendrogram of CHIKV E2 protein sequences showing the three genotype clusters (ECSA, Asian and WA) and the sub-lineages (IOL and American). Yellow highlights for isolates used in this study. The viruses used in the neutralization assays were: LR2006 OPY1, Tssetsarkin et al Vector Borne Zoonotic Dis. 2006, 6(4): 325-37; 37997 Vanlandingham et al Am J Trop Med Hyg. 2005, 72(5):616-21; AF15561, Harrison et al J Immunol. 1971, 107(3):643-7; and R99659, Lanciotti et al Emerg Infect Dis. 2014 20(8):1400-2.

| Lineage               | Strain          | Accession no. | Source           | Country                          | Year |
|-----------------------|-----------------|---------------|------------------|----------------------------------|------|
| Asian                 | TH35            | HM045810      | Human            | Thailand                         | 1958 |
|                       | AF15561         | EF452493      | Human            | Thailand                         | 1962 |
|                       | 3412-78         | HM045808      | Human            | Thailand                         | 1978 |
|                       | JKT23574        | HM045791      | Human            | Indonesia                        | 1983 |
|                       | PhH15483        | HM045790      | Human            | Philippines                      | 1985 |
|                       | MY/06/37348     | FN295483      | Human            | Malaysia, Perak                  | 2006 |
|                       | 0706aTw         | FJ807897      | Human            | Indonesia (Taiwan imported case) | 2007 |
|                       | NC/2011-568     | HE806461      | Human            | New Caledonia                    | 2011 |
|                       | chik-sy         | KF318729      | Human            | China                            | 2012 |
|                       | CHIKV-JC2012    | KC488650      | Human            | China                            | 2012 |
|                       | CHIKV-13-112A   | AB860301      | Human            | Philippines                      | 2013 |
|                       | DH130003        | KM673291      | Human            | Indonesia: Bali                  | 2013 |
|                       | Yap 13-2148     | KJ689453      | Aedes hensilli   | Micronesia, Yap State            | 2013 |
|                       | R99659          | KJ451624      | Human            | British Virgin Islands           | 2014 |
|                       | WHCHK29         | KR559498      | Human            | Dominican Republic               | 2014 |
|                       | WHCHK22         | KR559491      | Human            | Colombia                         | 2014 |
|                       | WHCHK19         | KR559488      | Human            | Honduras                         | 2014 |
|                       | WHCHK14         | KR559483      | Human            | Puerto Rico                      | 2014 |
|                       | WHCHK1          | KR559470      | Human            | Puerto Rico                      | 2014 |
|                       | WHCHK4          | KR559473      | Human            | French Polynesia                 | 2015 |
| ECSA                  | Angola M2022    | HM045823      | Human            | Angola                           | 1962 |
|                       | HB78            | HM045822      | Human            | Central African Republic         | 1978 |
|                       | UgAg4155        | HM045812      | Human            | Uganda                           | 1982 |
|                       | L2              | KF283986      | Human            | Comoros                          | 2005 |
|                       | 06-021          | AM258992      | Human            | Reunion                          | 2005 |
|                       | LR2006_OPY1     | DQ443544      | Human            | Reunion                          | 2006 |
|                       | TM25            | EU564334      | Human            | Mauritius                        | 2006 |
|                       | ITA07-RA1       | EU244823      | Aedes albopictus | Italy                            | 2007 |
|                       | RGCB120/KL07    | GQ428213      | Human            | India                            | 2007 |
|                       | SL-CR 3         | HM045799      | Human            | Sri Lanka                        | 2007 |
|                       | DRDE-07         | EU372006      | Human            | India                            | 2007 |
|                       | 0810bTw         | FJ807899      | Human            | Malaysia                         | 2008 |
|                       | MY/08/068       | FN295487      | Human            | Malaysia                         | 2008 |
|                       | 10Mdy7          | KF590564      | Human            | Myanmar                          | 2010 |
|                       | NL10/152        | KC862329      | Human            | Indonesia                        | 2010 |
|                       | BK46            | KJ579184      | Human            | Thailand                         | 2013 |
|                       | BHI3741/H804705 | KP164569      | Human            | Brazil                           | 2014 |
| S27-African prototype | AF369024        | -             | -                | -                                |      |
| West African          | IbH35           | HM045786      | Human            | Nigeria                          | 1964 |
|                       | 37997           | AY726732      | Aedes furcifer   | Senegal                          | 1983 |

LR2006-OPY1 (IOL/ECSA)  
La Reunion 2006

37997 (West African)  
Senegal 1983

R99659 (Asian)  
British Virgin Islands 2014

AF15561 (Asian)  
Thailand 1962

Day 35 SCV-ZIKA/CHIK 1 vaccination with  $10^7$  pfu

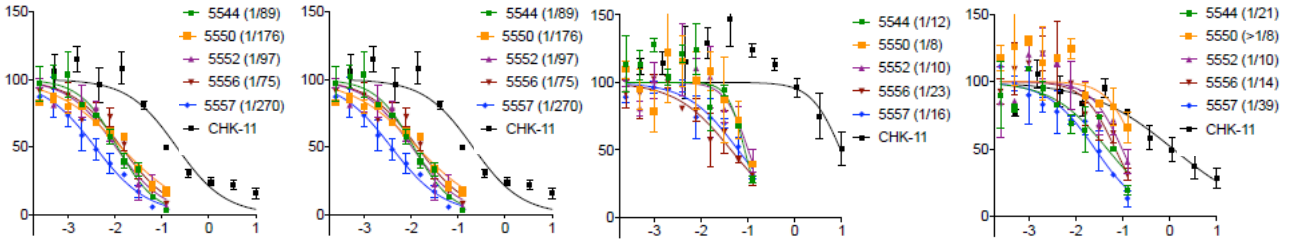

Day 35 SCV-ZIKA/CHIK 2 vaccinations with  $10^8$  pfu

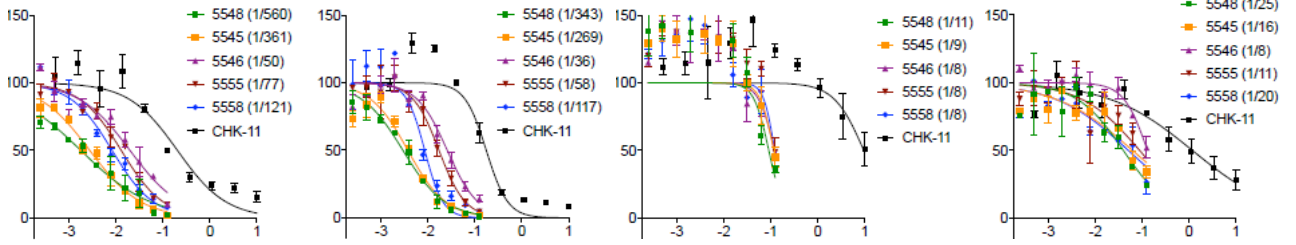

Day 35 SCV-control 2 vaccinations  $10^8$  pfu

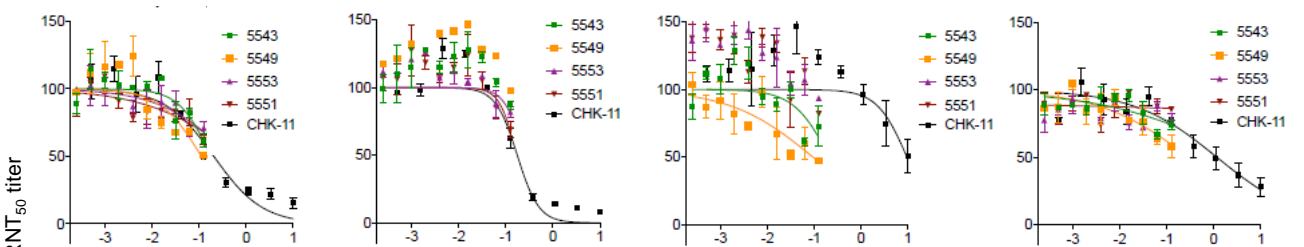

Day 70 SCV-ZIKA/CHIK 1 vaccination with  $10^7$  pfu

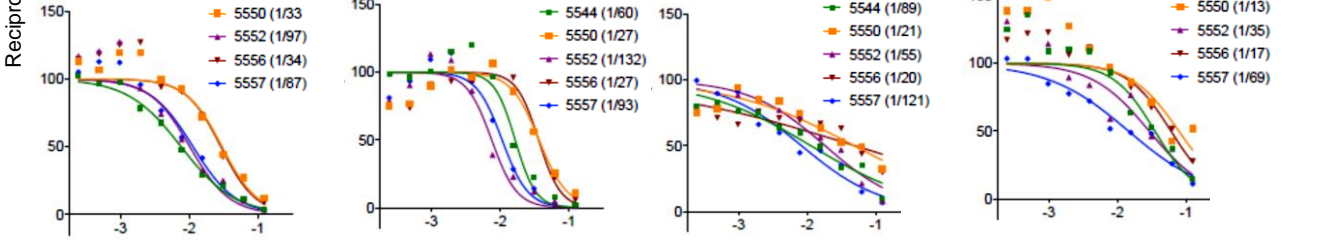

Day 70 SCV-ZIKA/CHIK 2 vaccinations with  $10^8$  pfu

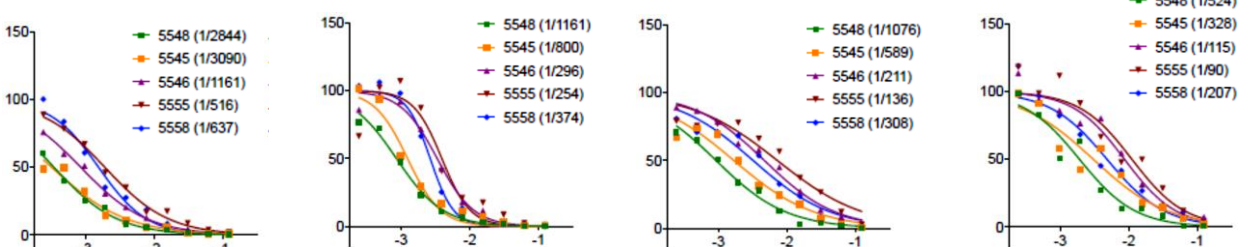

Day 70 SCV-control 2 vaccinations  $10^8$  pfu

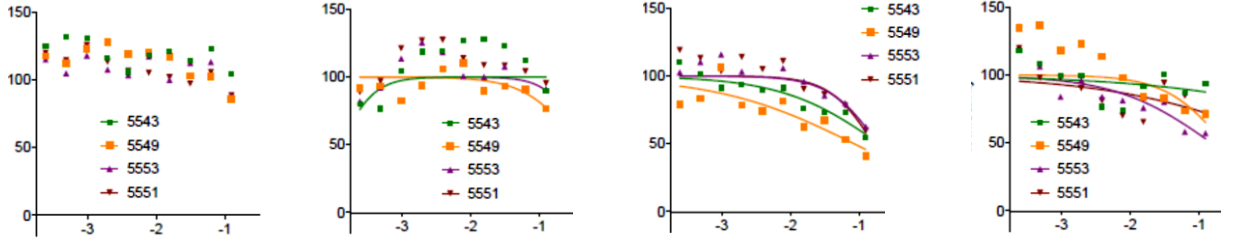

$\text{Log}_{10}$  serum dilution

Supplementary Fig. 4. Titration curves for Fig. 3.

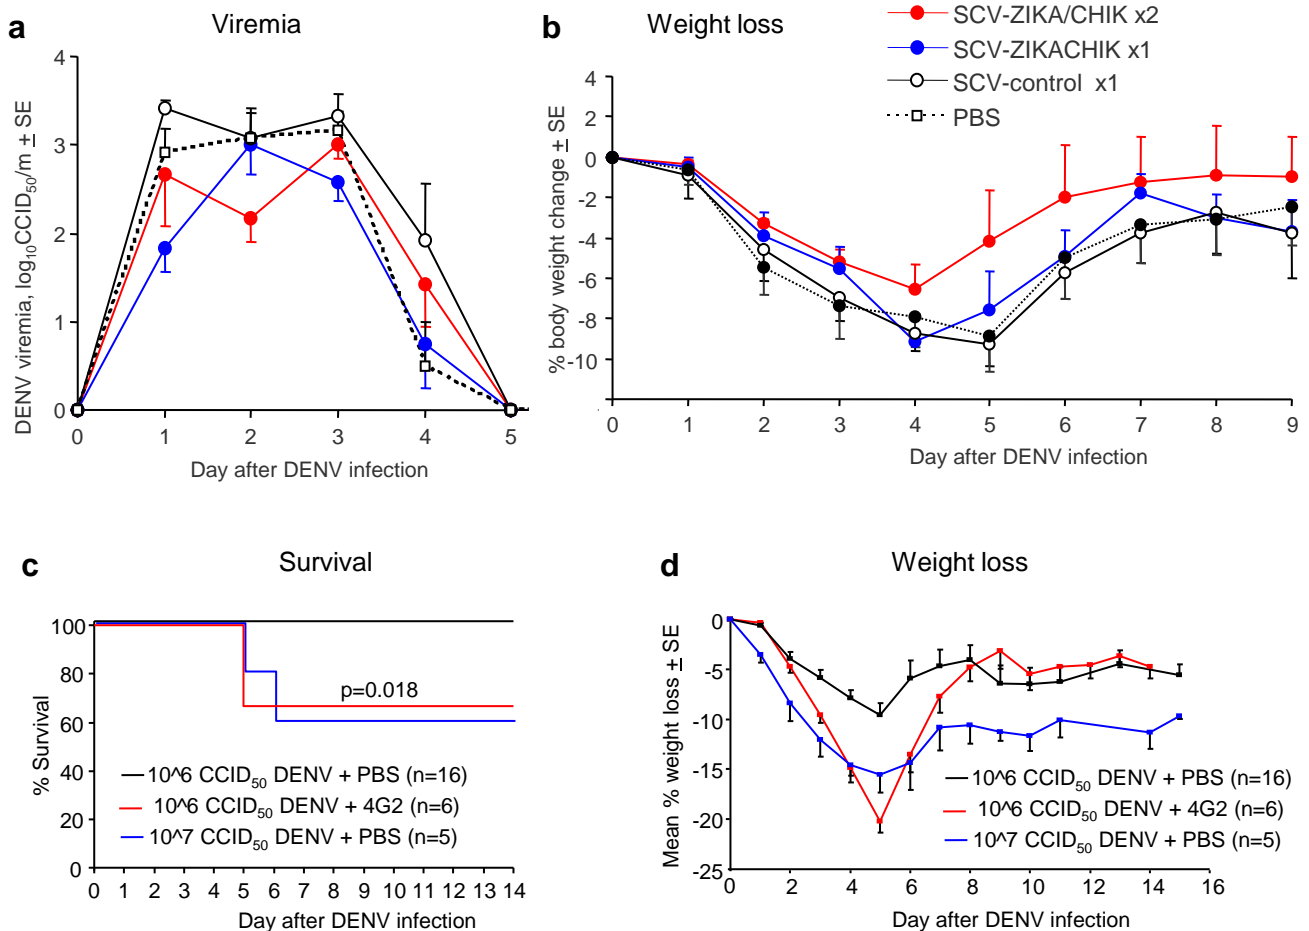

**Supplementary Fig. 5.** SCV-ZIKA/CHIK and DENV Antibody Dependent Enhancement (ADE). The DENV D220 mouse model in 6-10 week old female *IFNAR<sup>-/-</sup>* mice was adapted from (Sci Transl Med. 2015. 7(304):304ra142 and PLoS Pathog. 2010. 6(2):e1000790). **a** Viremia of mice infected s.c. with 10e6 CCID<sub>50</sub> (n=6) of DENV D220 3 weeks after vaccination with 10e6 pfu of the indicated SCV vaccines or PBS i.m. (as described Eldi et al 2017). **b** Weight loss for the same mice described in a. All mice survived, with no indication that SCV-ZIKA/CHIK vaccination exacerbated weight loss after DENV challenge.

ADE mediated by 4G4 antibody. **c** Survival of mice infected with the indicated dose of DENV D220 after receiving the anti-flavivirus antibody 4G2 i.p. (0.6 µg) or PBS, 1 day after DENV infection. Statistics by log rank (Mantel-Cox) for the 10e6 dose of DENV D220 and PBS versus 4G4 antibody. **d** Weight loss for the same mice described in c. 4G4 treated mice showed significantly higher weight loss day 3 p=0.016, day 4 p=0.001, day 5 p=0.005 and day 6 p=0.007; statistics by Kolmogorov–Smirnov and t tests. Thus in this model ADE did not manifest as a change in viremia (not shown), but did increase mortality and weight loss.

STKDNFNVYKATRPYLAH 06-021 (SCV-ZIKA/CHIK)  
STKDNFNVYKATRPYLAH LR2006 OPY1 (IOL)  
STKDNFNVYKATRPYLAH 37997 (WA)  
SIKDNFNVYKATRPYLAH R99659 (Asian, 2014)  
SIKDNFNVYKATRPYLAH AF15561 (Asian, 1962)

**E2EP3 epitope**

**Supplementary Fig. 6.** The E2EP3 epitope. In the early convalescent phase of CHIKV-infected patients and NHPs, neutralizing IgG3 responses were directed to a single linear epitope "E2EP3", located at the N-terminus of the E2 protein. The Asian isolates have 1 and two non-conservative substitutions in this epitope.
